# Supplementary material for: Tunable properties of GO-doped CoFe2O4 nanofibers elaborated by electrospinning
Source: Royal Society of Chemistry journal article supplement (doi:10.1039/c5ra14897a), 2015-01-01
Supplement: c5ra14897a1.pdf [file c5ra14897a1.pdf]

## Supporting Information

### Tunable properties of GO-doped $\text{CoFe}_2\text{O}_4$ nanofibers elaborated by Electrospinning

C. Eid, E. Assaf, R. Habchi, P. Miele, and M. Bechelany

#### Characterization of Graphene oxide

The Atomic Force Microscopy (AFM) (Figures S1) shows the formation of single layers of Graphene Oxide by exfoliation with the thickness of about  $1 \pm 0.2$  nm with a lateral size of approximately  $0.4 \times 1.0$   $\mu\text{m}$  demonstrated a very efficient exfoliation of GO.

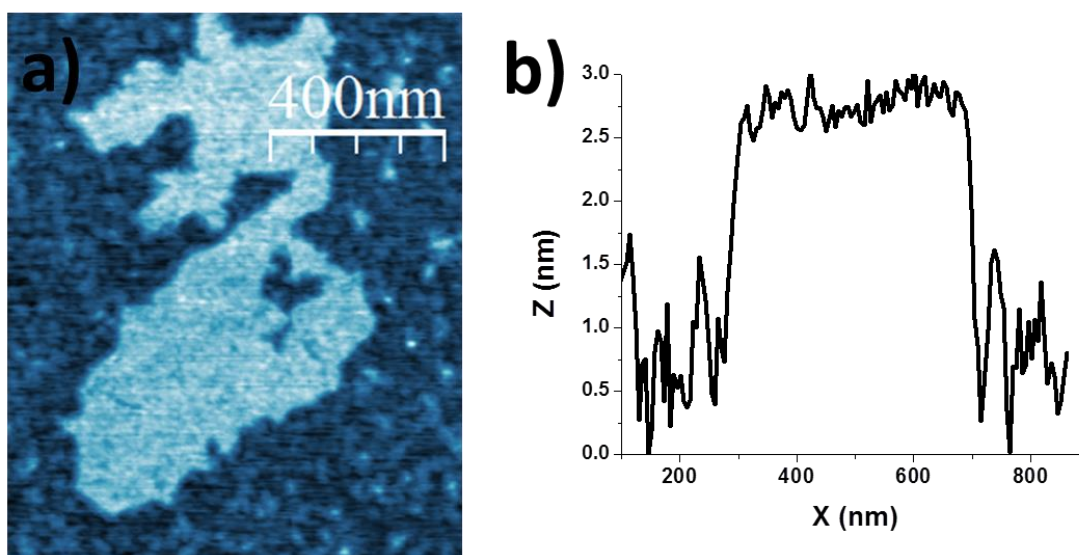

**Figure S1.** a) AFM topographic image and (b) height profile of a single layer Graphene Oxide
